# Supplementary material for: The exploitation of thermophile resources in hot springs: fluorescent carbon dots derived from Ureibacillus thermosphaericus for multicolour cellular imaging and selectivity detection of heavy metals
Source: Royal Society of Chemistry journal article supplement (doi:10.1039/d0ay02213f), 2021-01-01
Supplement: d0ay02213f1.pdf [file d0ay02213f1.pdf]

## The exploitation of thermophiles resources in hot springs: Fluorescent carbon dots derived by *Ureibacillus thermosphaericus* for multicolour cellular imaging and selectivity detection of heavy metal

Bin Wang <sup>#a,b</sup>, Yang Ji <sup>#c</sup>, Yonghua Xia <sup>b</sup>, Kunhao Qin <sup>c</sup>, Bo Li <sup>a\*</sup>

a. Faculty of Land Resource Engineering, Kunming University of Science and Technology, Kunming 650500, China.

b. City College, Kunming University of Science and Technology, Kunming 650500, China.

c. Shenzhen Institute of Respiratory Diseases, Second Clinical Medical College (Shenzhen People's Hospital), Jinan University; the First Affiliated Hospital (Shenzhen People's Hospital), Southern University of Science and Technology, Shenzhen 518000, China

#. These authors have contributed equally to this work.

\*. Corresponding author: 2757179920@qq.com

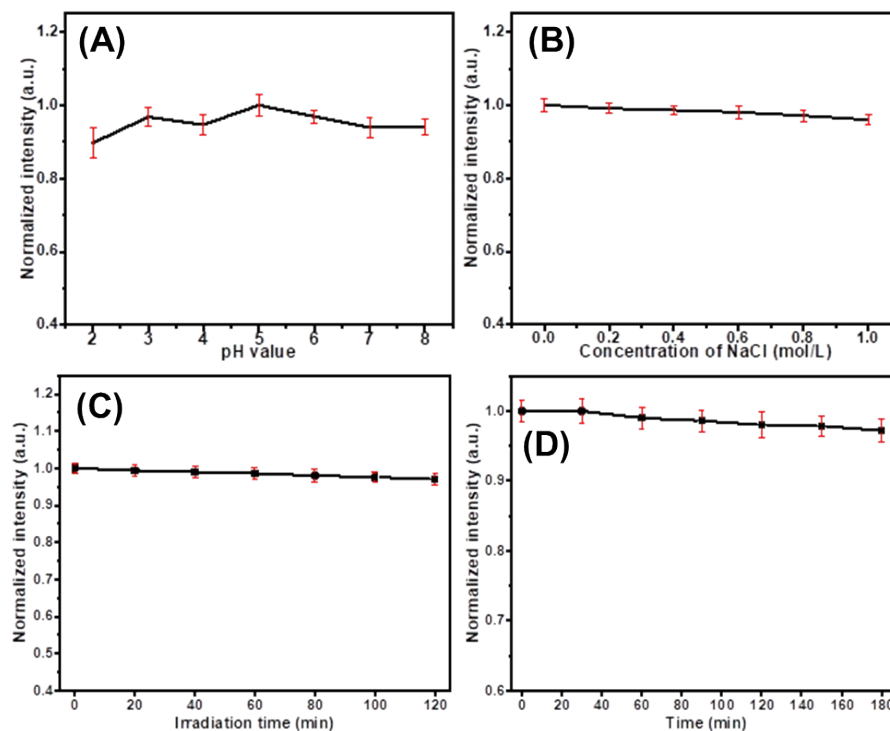

**Fig. S1** (A) The fluorescence intensity of CDs-HS18 varying with the sample pH value from 2 to 8. (B) Normalized fluorescence intensity of CDs-HS18 in different NaCl concentrations ranging from 0 to 1 M. (C) Normalized fluorescence intensity of CDs-HS18 under UV (365 nm) irradiation for 2 h. (D) Fluorescence intensity of CDs-HS18 under 70 °C for 3 h.

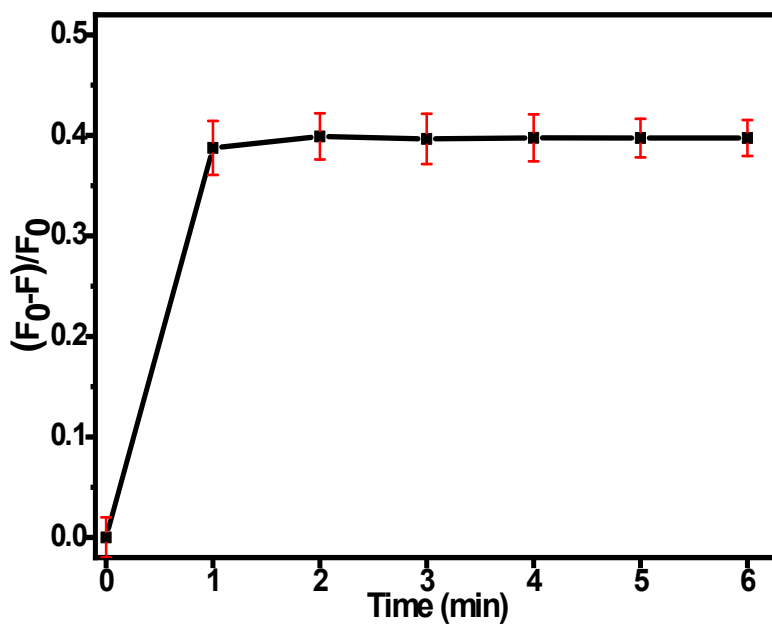

**Fig. S2** Effect of reaction time on the detection of Cr<sup>6+</sup> with CDs-HS18.

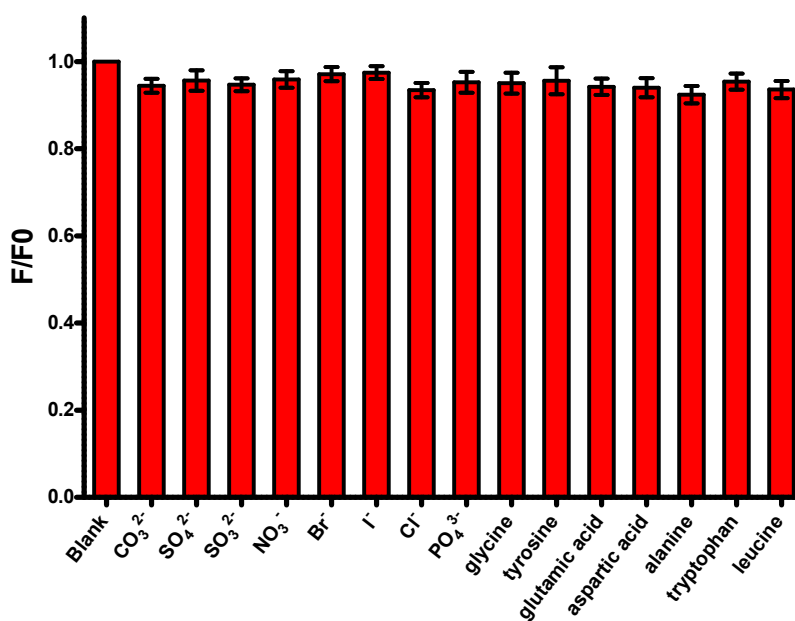

**Fig. S3** Fluorescence quenching efficiency of common anions (100  $\mu$ M) and amino acids (100  $\mu$ M) toward CDs-HS18.
